# Supplementary material for: Inhibition of the Notch signal transducer CSL by Pkc53E-mediated phosphorylation to fend off parasitic immune challenge in Drosophila
Source: eLife. 2024 Nov 6;12:RP89582. doi: 10.7554/eLife.89582 (PMC11540305; doi:10.7554/eLife.89582)
Supplement: Figure 1—figure supplement 1—source data 1. [file elife-89582-fig1-figsupp1-data1.xlsx]

## Sheet: S1_A
Notch Epistasis: sessile crystall cell count
	hml::w-RNAi	hml::N-RNAi; Su(H)gwt	hml::N-RNAi; Su(H)S269A		Dunn's multiple comparisons test	Mean rank diff	Significant?	Summary	Adjusted P Value
	102	6	4		hml::w-RNAi vs. hml::N-RNAi; Su(H)gwt	48.12	Yes	****	<0,000001	A-B
	99	20	10		hml::w-RNAi vs. hml::N-RNAi; Su(H)S269A	38.88	Yes	****	<0,000001	A-C
	110	9	16		hml::N-RNAi; Su(H)gwt vs. hml::N-RNAi; Su(H)S269A	-9.241	No	ns	0.489996	B-C
	126	10	1
	115	16	24
	106	7	28
	110	10	1
	95	1	1
	128	24	4
	98	13	0
	102	27	14
	103	0	18
	101	2	20
	115	10	16
	98	8	25
	110	1	26
	111	9	25
	102	0	6
	117	4	23
	124	3	6
	118	1	26
	113	12	14
	117	0	31
	94	5	5
	109	7	19
	106	5	20
	107	18	22
	114	20	0
	116	10	15
MW	109.172	8.89655	14.4828
SD	9.03196	7.42748	9.81843
n	29	29	29

## Sheet: S1_B
Hemocyte numbers of non infected larvae
Su(H)gwt	Su(H)S269A	Su(H)S269D		Tukey's multiple comparisons test	Mean Diff	95,00% CI of diff	Below threshold?	Summary	Adjusted P Value
14660	11963.4	13446.6		Su(H)gwt vs. Su(H)S269A	-365.3	-1462 to 731,1	No	ns	0.707276
11893.4	14750	13730		Su(H)gwt vs. Su(H)S269D	811.3	-275,9 to 1899	No	ns	0.182419
12143.4	12240	12308		Su(H)S269A vs. Su(H)S269D	1177	89,37 to 2264	Yes	*	0.030723
11553.4	10590	9833.4
15220	14543.4	10156.6
13293.4	12186.6	9123.4
15130	15966.6	10346.6
11293.4	13493.4	14470
10410	14000	12616.6
10166.6	15223.4	13040
13590	12640	10846.6
12320	13846.6	15583.4
13196.6	13976.6	10110
12173.4	12850	12980
8940	13163.4	10083.4
12433.4	13723.4	11813.4
13100	9633.4	8740
10850	10590	9426.6
11966.6	11536.6	13176.6
10796.6	10746.6	11613.4
12076.6	11913.4	10350
11453.4	10686.6	11120
13323.4	16790	13533.4
11796.6	12900	9953.4
13656.6	10720	8876.6
8640	12776.6	8476.6
13270	11670	11963.4
12940	11416.6	11963.4
13396.6	9740	11963.4
		11963.4
12264.9	12630.2	11453.6
1600.25	1816.41	1851.9
29	29	30

## Sheet: S1_C
Hemocyte numbers of infected larvae
	Su(H)gwt	Su(H)S269A	Su(H)S269D		Tukey's multiple comparisons test	Mean Diff	95,00% CI of diff	Below threshold?	Summary	Adjusted P Value
	11013.4	9106.6	12556.6		Su(H)gwt vs. Su(H)S269A	-325.7	-1392 to 740,8	No	ns	0.748371
	13646.6	10823.4	8893.4		Su(H)gwt vs. Su(H)S269D	275.8	-828,0 to 1380	No	ns	0.823376
	10246.6	10633.4	11296.6		Su(H)S269A vs. Su(H)S269D	601.5	-537,0 to 1740	No	ns	0.42286
	11436.6	10740	7570
	9833.4	15026.6	12383.4
	9453.4	11189	8926.6
	10186.6	9533.4	9066.6
	14853.4	7896.6	7428
	11180	11753.4	7126.6
	14173.4	11060	10453.4
	10753.4	13050	9796.6
	10503.4	10956.6	9846.6
	7906.6	10743.4	10916.6
	9316.6	11983.4	13653.4
	10680	9476.6	8666.6
	9890	8673.4	12406.6
	6536.6	11946.6	7536.6
	8913.4	10296.6	8450
	11520	11726.6	7250
	11926.6	9180	13486.6
	10760	9416.6	10776.6
	9070	11500	12866.6
	9166.6	7613.4	10593.4
	11583.4	8103.4	13706.6
	9886.6	9133.4	12086.6
	9756.6	11146.6	6816.6
	8190	9010	11446.6
	10446.6	9963.4	12046.6
	9426.6	14706.6	9043.4
	10503.4	12886.6	10283.4
	11953.4	10063.4
	8003.4	11593.4
	10496	12996.6
	12940	14883.4
	10712
	9976.6
	13326.6
	8596.6
	11583.4
MW	10521.7	10847.4	10245.9
SD	1742.8	1895.63	2125.39
N	39	34	30
