# Supplementary material for: Inhibition of the Notch signal transducer CSL by Pkc53E-mediated phosphorylation to fend off parasitic immune challenge in Drosophila
Source: eLife. 2024 Nov 6;12:RP89582. doi: 10.7554/eLife.89582 (PMC11540305; doi:10.7554/eLife.89582)
Supplement: Figure 1—source data 1. [file elife-89582-fig1-data1.xlsx]

## Sheet: 1A
Crystal cell numbers in larvae +/- infested with L. boulardi
		infested L.b.			infested L.b.
	Su(H) gwt	Su(H) gwt		Su(H)S269A	Su(H)S269A			Dunn's multiple comparisons test	Mean rank diff	Significant?	Summary	Adjusted P Value
	43	39		209	104			Su(H) gwt vs. Su(H) gwt inf	127.4	Yes	****	<0,000001
	109	70		91	100			Su(H) gwt vs. Su(H)S269A	-68.82	Yes	****	6.4e-05
	133	47		154	101			Su(H) gwt vs. Su(H)S269A inf	-20.51	No	ns	0.907134
	98	48		118	145			Su(H) gwt inf vs. Su(H)S269A	-196.2	Yes	****	<0,000001
	115	57		66	141			Su(H) gwt inf vs. Su(H)S269A inf	-147.9	Yes	****	<0,000001
	92	58		79	150			Su(H)S269A vs. Su(H)S269A inf	48.31	Yes	**	0.008216
	49	41		118	147
	67	37		178	134
	142	18		91	150
	44	15		159	144
	136	32		167	152
	93	54		93	130
	130	77		200	137
	97	44		129	147
	62	39		145	105
	48	46		76	145
	97	72		211	165
	40	58		157	124
	52	52		107	77
	66	60		94	171
	99	46		137	124
	108	55		83	85
	42	48		108	75
	72	70		165	71
	36	59		129	97
	59	69		149	85
	54	71		153	70
	126	34		109	109
	116	46		197	86
	84	54		120	80
	124	51		85	77
	95	49		106	90
	79	40		108	81
	39	43		108	86
	54	54		201	76
	75	20		113	67
	90	61		156	68
	106	13		184	140
	51	53		186	90
	54	49		131	104
	156	23		199	80
	93	27		158	157
	114	30		106	88
	89	39		109	81
	99	37		121	85
	102	32		97	60
	114	24		145	81
	122	31		72	172
	97	28		126	80
	88	38		108	60
	72	35		130	91
	79	9		209	71
	148	21		191	92
	74	55		156	115
	152	44		71	109
	101	29		162	156
	102	22		122	98
	114	12		126	126
	113	20		139	72
	103	35		83	72
	86	17		88	126
	51	11		135	105
	83	26		71	97
	139	33		97	77
	139	24		102	89
	119	26		118	64
	91	74		95	65
	126	49		150	110
	123	42		167	59
	119	51		87	97
	51	65			119
	87	62			157
	52	42			135
	122	34			97
	132	86			88
	110	63			154
	50	61			63
	139	25			109
	135	35			59
	137	49			65
	125				137
	71				81
	93				96
	141				115
	124				105
					91
					61
					100
					117
					149
					108
					101
					156
					112
					58
					78
					122
					121
					91
					107
MW	94.7412	42.6875		130.143	104.17
SD	32.054	17.4222		39.3539	30.5875
Box plot statistics
	wt	wt L.b.		SA	SA L.b.
Upper whisker	156.00	86.00		211.00	172.00
3rd quartile	122.00	54.50		157.00	126.00
Median	97.00	42.50		124.00	99.00
1st quartile	71.00	29.50		97.00	80.00
Lower whisker	36.00	9.00		66.00	58.00
Nr. of data points	85.00	80.00		70.00	100.00

## Sheet: 1B
Crystal cell index in lymph glands of larvae +/- infested with L. boulardi
							index: (Hnt positive cells / lobe size pixels * 40000)
	Indices
		infested L.b.			infested L.b.		Su(H)gwt			Su(H)gwt infested			Su(H)S269A			Su(H)S269A infested
	Su(H) gwt	Su(H) gwt		Su(H)S269A	Su(H)S269A		Hnt+ cells	lobe size [px]	index	Hnt+ cells	lobe size [px]	index	Hnt+ cells	lobe size [px]	index	Hnt+ cells	lobe size [px]	index		Dunn's multiple comparisons test	Mean rank diff	Significant?	Summary	Adjusted P Value
	6.99	1.2773		25.37	15.81		12	68653	6.99	1	31316	1.2773	32	50454	25.37	26	65795	15.81		Su(H)gwt vs. Su(H)gwt inf	17.3	Yes	*	0.039765
	11.82	1.25		24.67	24.05		14	47396	11.82	1	31959	1.25	26	42111	24.67	43	71518	24.05		Su(H)gwt vs. Su(H)S269A	-23.47	Yes	**	0.001384
	13.35	1.13		24.1	13.87		20	59934	13.35	1	35264	1.13	42	69621	24.1	24	69218	13.87		Su(H)gwt vs. Su(H)S269A inf	-14.63	No	ns	0.129881
	14.01	0.72		47.33	19.86		23	65648	14.01	1	55186	0.72	95	80286	47.33	17	34236	19.86		Su(H)gwt inf vs. Su(H)S269A	-40.77	Yes	****	<0,000001
	18.01	0		43.7	15.85		29	64406	18.01	0	74394	0	113	103440	43.7	26	65616	15.85		Su(H)gwt inf vs. Su(H)S269A inf	-31.93	Yes	****	3e-06
	11.51	0.91		29.2	24.18		21	73007	11.51	1	43807	0.91	72	98665	29.2	43	71124	24.18		Su(H)S269A vs. Su(H)S269A inf	8.833	No	ns	0.993977
	9.24	1.78		39.87	12.93		21	90938	9.24	1	22441	1.78	127	127414	39.87	23	71118	12.93
	11.2	0		15.83	20.11		19	67844	11.2	0	25534	0	34	85938	15.83	17	33810	20.11
	13.16	0		29.68	24.19		19	57766	13.16	0	28581	0	56	75463	29.68	14	24803	24.19
	9.66	0		14.51	19.87		7	28986	9.66	0	57236	0	20	55122	14.51	22	44283	19.87
	16.43	0		13.16	31.97		10	24351	16.43	0	58786	0	19	57752	13.16	25	31280	31.97
	16.96	0.99		22.49	20.7		15	35381	16.96	2	80561	0.99	30	53362	22.49	27	52161	20.7
	10.62	0		51.48	19.6		6	22597	10.62	0	34391	0	77	59833	51.48	20	40803	19.6
	7.7	1.26		38.25	15.3		4	20782	7.7	1	31703	1.26	74	77387	38.25	11	28760	15.3
	13.12	0		21.43	14.74		10	30498	13.12	0	46138	0	29	54125	21.43	8	21710	14.74
MW	12.252	0.621153		29.4047	19.5353				12.252			0.621153			29.4047			19.5353
SD	3.13429	0.620001		11.688	4.92795				3.13429			0.620001			11.688			4.92795
Box plot statistics
	Su(H) gwt	Su(H) gwt + L.b.	Su(H)S269A	Su(H)S269A + L.b.
Upper whisker	18.01	1.78	51.48	31.97
3rd quartile	13.68	1.19	39.06	22.38
Median	11.82	0.72	25.37	19.86
1st quartile	10.14	0	21.96	15.55
Lower whisker	6.99	0	13.16	12.93
Nr. of data points	15	15	15	15

## Sheet: 1C
PPO3::GFP positive cells in hemolymph in % of DAPI positive cells = lamellocytes relative to all cells; each slide represents hemolymphe of ten pooled larvae
		infested L.b.			infested L.b.			Genotype:	gSu(H)wt; PPO3-Gal4, UAS-GFP					Genotype:	gSu(H)wt; PPO3-Gal4, UAS-GFP				Su(H)S269A
	Su(H) gwt	Su(H) gwt		Su(H)S269A	Su(H)S269A														vs
									not infested						infested with L.boulardi				Su(H) gwt
	1.2	18.78		0.15	4.91			Slide	lamellocytes	DAPI pos cells	% lamellocytes			Slide	lamellocytes	DAPI pos cells	% lamellocytes
	0.88	12.06		0.22	4.44			#1	8	874	0.00915332			#1	178	948	0.187764		Unpaired t test
	0.21	14.79		0.49	4.02			#2	13	1080	0.012037			#2	110	912	0.120614		P value	0.162679
	0.62	13.95		0.64	2.53			#3	8	912	0.00877193			#3	131	886	0.147856		P value summary	ns
	0.79	14.37		0.58	3.07			#4	2	933	0.00214362			#4	126	903	0.139535		Significantly different (P < 0.05)?	No
	0.23	12.23		0.89	3.9			#5	6	975	0.00615385			#5	118	821	0.143727		One- or two-tailed P value?	Two-tailed
	0.61	17.38		0.56	6.86			#6	5	630	0.00793651			#6	90	736	0.122283		t, df	t=1,447, df=21
	0.75	11.2		0.64	4.27			#7	2	852	0.00234742			#7	159	915	0.17377
	0.83	9.16		0.94	3.65			#8	4	653	0.00612557			#8	139	1241	0.112006
	0.57	16.34		0.33	3.3			#9	8	1071	0.00746965			#9	94	1026	0.0916179
	0.74	19.19		0.46	2.58			#10	10	1212	0.00825083			#10	141	863	0.163384
	0.92	20.68						#11	5	883	0.00566251			#11	118	615	0.19187		Su(H)S269A inf
								#12	7	945	0.00740741			#12	299	1446	0.206777		vs
MW	0.695833	15.0108		0.536364	3.95727														Su(H)gwt inf
SD	0.278322	3.54159		0.247357	1.22144
																			Unpaired t test
								Genotype:	gSu(H)S269A; PPO3-Gal4, UAS-GFP					Genotype:	gSu(H)S269A; PPO3-Gal4, UAS-GFP				P value	<0,000001
Box plot statistics																			P value summary	****
									not infested						infested with L.boulardi				Significantly different (P < 0.05)?	Yes
	Su(H) gwt	Su(H) gwt + L.b.	Su(H)S269A	Su(H)S269A + L.b.				Slide	lamellocytes	DAPI pos cells	% lamellocytes			Slide	lamellocytes	DAPI pos cells	% lamellocytes		One- or two-tailed P value?	Two-tailed
Upper whisker	1.2	20.68	0.94	4.91				#1	1	680	0.00147059			#1	42	856	0.0490654		t, df	t=9,104, df=20
3rd quartile	0.85	18.08	0.64	4.36				#2	2	914	0.00218818			#2	46	1035	0.0444444
Median	0.74	14.58	0.56	3.9				#3	6	1223	0.00490597			#3	40	995	0.040201
1st quartile	0.59	12.14	0.4	3.18				#4	10	1563	0.00639795			#4	41	1620	0.0253086
Lower whisker	0.21	9.16	0.15	2.53				#5	6	1031	0.00581959			#5	14	456	0.0307018
Nr. of data points	12	12	11	11				#6	12	1344	0.00892857			#6	46	1178	0.0390492
								#7	8	1421	0.00562984			#7	65	948	0.0685654
								#8	5	787	0.00635324			#8	38	890	0.0426966
								#9	11	1175	0.0093617			#9	29	794	0.0365239
								#10	3	910	0.0032967			#10	37	1122	0.0329768
								#11	4	865	0.00462428			#11	20	775	0.0258065

## Sheet: 1D
attila-GFP positive cells in hemolymph in % of DAPI positive cells = lamellocytes relative to all cells; each slide represents hemolymphe of then pooled larvae
		infested L.b.			infested L.b.
	Su(H) gwt	Su(H) gwt		Su(H)S269A	Su(H)S269A				Genotype:	gSu(H)wt atilla-GFP										Su(H)S269A
																				vs
	0.39	24.42		0.39	9.31					not infested						infested with L.boulardi				Su(H)gwt
	0.1	18.91		0.3	8.65				Slide	lamellocytes	DAPI pos cells	% lamellocytes			Slide	lamellocytes	DAPI pos cells	% lamellocytes
	0.69	22.5		1.08	10.44				#1	6	1535	0.00390879			#1	876	3588	0.244147		Unpaired t test
	1.07	17.5		0.32	14.05				#2	1	984	0.00101626			#2	644	3405	0.189134		P value	0.828316
	0.11	23.28		0.44	8.85				#3	13	1876	0.00692964			#3	741	3294	0.224954		P value summary	ns
	0.42	21.72		0.97	12.95				#4	16	1491	0.0107311			#4	445	2543	0.17499		Significantly different (P < 0.05)?	No
	0.79	28.05		0.38	9.27				#5	2	1828	0.00109409			#5	872	3745	0.232844		One- or two-tailed P value?	Two-tailed
	1.43	28.26		0.77	11.21				#6	4	955	0.00418848			#6	894	4116	0.217201		t, df	t=0,2210, df=14
									#7	13	1640	0.00792683			#7	1212	4321	0.280491
									#8	41	2863	0.0143206			#8	1416	5010	0.282635
MW	0.625	23.08		0.58125	10.5912
SD	0.465311	3.85598		0.311652	2.00428															Su(H)S269A inf
																				vs
									Genotype:	gSu(H)S269A atilla-GFP										Su(H)gwt inf
Box plot statistics										not infested						infested with L.boulardi				Unpaired t test
									Slide	lamellocytes	DAPI pos cells	% lamellocytes			Slide	lamellocytes	DAPI pos cells	% lamellocytes		P value	1e-06
	Su(H) gwt	Su(H) gwt + L.b.	Su(H)S269A	Su(H)S269A + L.b.					#1	5	1266	0.00394945			#1	267	2867	0.0931287		P value summary	****
Upper whisker	1.43	28.26	1.08	14.05					#2	3	987	0.00303951			#2	349	4034	0.0865146		Significantly different (P < 0.05)?	Yes
3rd quartile	0.93	26.23	0.87	12.08					#3	25	2321	0.0107712			#3	369	3533	0.104444		One- or two-tailed P value?	Two-tailed
Median	0.55	22.89	0.42	9.88					#4	5	1545	0.00323625			#4	526	3745	0.140454		t, df	t=8,128, df=14
1st quartile	0.25	20.31	0.35	9.06					#5	4	912	0.00438596			#5	294	3321	0.0885276
Lower whisker	0.1	17.5	0.3	8.65					#6	18	1858	0.00968784			#6	464	3575	0.12979
Nr. of data points	8	8	8	8					#7	5	1310	0.00381679			#7	242	2610	0.0927203
									#8	17	2213	0.00768188			#8	391	3489	0.112066

## Sheet: 1E
Lamellocyte index (PPO3::GFP positive cells) in lymph glands of larvae +/- infected with L. boulardi
genotype: Su(H)wt; PPO3-Gal4, UAS-GFP or				Su(H)S269A; PPO3-Gal4, UAS-GFP				infected with L. boulardi
	Indices						index: (GFP positive cells / lobe size pixels (512)) * 40000
		infested L.b.			infested L.b.		Su(H)gwt			Su(H)gwt infected			Su(H)S269A			Su(H)S269A infected				Su(H)S269A
	Su(H) gwt	Su(H) gwt		Su(H)S269A	Su(H)S269A		GFP+ cells	lobe size [px]	index	GFP+ cells	lobe size [px]	index	GFP+ cells	lobe size [px]	index	GFP+ cells	lobe size [px]	index		vs
																				Su(H)gwt
	0	15.39		0	0		0	71764	0	19	49370	15.39	0	55199	0	0	42533	0
	0	39.77		0	0		0	55394	0	37	37214	39.77	0	53457	0	0	26694	0		Unpaired t test
	0	2.65		0	0		0	75431	0	4	60439	2.65	0	50654	0	0	128651	0		P value	0.631944
	0	6.42		0	3.01		0	55030	0	6	37396	6.42	0	88873	0	5	66408	3.01		P value summary	ns
	0	21.27		0	2.64		0	54347	0	20	37608	21.27	0	67669	0	4	60653	2.64		Significantly different (P < 0.05)?	No
	2.19	8.56		0	0		3	54769	2.19	10	46703	8.56	0	47249	0	0	53231	0		One- or two-tailed P value?	Two-tailed
	0	7.6		0	0		0	64136	0	5	26329	7.6	0	66495	0	0	49498	0		t, df	t=0,4843, df=28
	0	14.76		1.02	0		0	74376	0	15	40637	14.76	2	78238	1.02	0	84677	0
	0	3.53		0	0		0	63663	0	5	56667	3.53	0	64968	0	0	39545	0
	0	44.41		0	1.87		0	74558	0	80	72058	44.41	0	62058	0	3	64193	1.87		Su(H)S269A inf
	0	34.23		0	3.06		0	95132	0	35	40896	34.23	0	82970	0	7	91365	3.06		vs
	0	23.53		0	3.02		0	81438	0	31	52707	23.53	0	54825	0	4	52962	3.02		Su(H)gwt inf
	0	18.26		0	2.39		0	44128	0	25	54776	18.26	0	66698	0	6	100383	2.39
	0	16.33		0	0.92		0	25851	0	17	41634	16.33	0	31814	0	2	87397	0.92		Unpaired t test
	0	10.7		0	2.55		0	34252	0	14	52359	10.7	0	54727	0	7	109969	2.55		P value	3.3e-05
																				P value summary	****
																				Significantly different (P < 0.05)?	Yes
MW	0.146	17.8273		0.068	1.29733															One- or two-tailed P value?	Two-tailed
SD	0.546282	12.4512		0.254433	1.31214															t, df	t=4,940, df=28
Box plot statistics
	Su(H) gwt	Su(H) gwt + L.b.	Su(H)S269A	Su(H)S269A + L.b.
Upper whisker	0	39.77	0	3.06
3rd quartile	0	22.4	0	2.59
Median	0	15.39	0	0.92
1st quartile	0	8.08	0	0
Lower whisker	0	2.65	0	0
Nr. of data points	15	15	15	15

## Sheet: 1F
Lamellocyte index (attila-GFP positive cells) in lymph glands of larvae +/- infected with L. boulardi
		infested L.b.			infested L.b.		index: (attila-GFP positive cells / lobe size pixels * 40000)													Su(H)S269A
alt!!	Su(H) gwt	Su(H) gwt		Su(H)S269A	Su(H)S269A		Su(H)gwt			Su(H)gwt infested			Su(H)S269A			Su(H)S269A infested				vs
							atilla-GFP+ cells	lobe size [px]	index	atilla-GFP+ cells	lobe size [px]	index	atilla-GFP+ cells	lobe size [px]	index	atilla-GFP+ cells	lobe size [px]	index		Su(H)gwt
	0	25.52		0	0		0	68653	0	53	83058	25.52	0	50454	0	0	70344	0
	0	36.3		0	0		0	47396	0	32	35263	36.3	0	42111	0	1	71223	0		Unpaired t test
	0	40.6		0	0		0	59934	0	56	55186	40.6	0	69621	0	0	69218	0		P value	0.930443
	0	13.44		0	0		0	50392	0	25	74393	13.44	0	80286	0	0	34236	0		P value summary	ns
	0	45.74		0	0		0	59612	0	23	20116	45.74	0	84672	0	0	39434	0		Significantly different (P < 0.05)?	No
	0	18.36		0	0		0	73007	0	19	41387	18.36	0	83884	0	0	71124	0		One- or two-tailed P value?	Two-tailed
	0	40.77		0	0.56		0	46788	0	26	25507	40.77	0	127414	0	1	71118	0.56		t, df	t=0,08808, df=28
	0.59	19.08		0	0		1	67844	0.59	20	41927	19.08	0	85938	0	0	33810	0
	0.53	21.77		0	0		1	75959	0.53	32	58786	21.77	0	75463	0	0	24803	0
	0	16.46		0.53	0		0	28986	0	12	29155	16.46	1	75463	0.53	0	39303	0		Su(H)S269A inf
	0	28.31		0	0		0	70010	0	22	31089	28.31	0	57752	0	0	31280	0		vs
	0	19.86		0.69	0.77		0	35381	0	40	80561	19.86	1	57751	0.69	1	52161	0.77		Su(H)gwt inf
	0	32.57		0	0		0	34108	0	28	34390	32.57	0	35517	0	0	40803	0
	0	14.73		0	0		0	20782	0	33	89630	14.73	0	77387	0	0	28760	0		Unpaired t test
	0	21.45		0	0		0	30498	0	17	31702	21.45	0	54125	0	0	21710	0		P value	<0,000001
																				P value summary	****
MW	0.0746667	26.3307		0.0813333	0.0886667				0.0746667			26.3307			0.0813333			0.0886667		Significantly different (P < 0.05)?	Yes
SD	0.190678	10.1077		0.209408	0.229285				0.190678			10.1077			0.209408			0.229285		One- or two-tailed P value?	Two-tailed
																				t, df	t=9,712, df=28
	Box plot statistics
		Su(H) gwt	Su(H) gwt	Su(H)S269A	Su(H)S269A
	Upper whisker	0	45.74	0	0
	3rd quartile	0	34.44	0	0
	Median	0	21.77	0	0
	1st quartile	0	18.72	0	0
	Lower whisker	0	13.44	0	0
	Nr. of data points	15	15	15	15

## Sheet: 1G
qRT-PCR from hemolymph; 0-6h and 24-30h after infection with L. boulardi
reference cyp33 and tbp
0-6h after infection								0-6h after infection
Gene	Treatment Group	Expression Ratio	Std. Error	95% C.I.	P Value	Result		Gene	Treatment Group	Expression Ratio	Std. Error	95% C.I.	P Value	Result
GFP_1	WT_L.b._0-6h	0.55705	0,421 - 0,724	0.0335	0.031	Down		atilla_4	WT_L.b._0-6h	1.72414	0,700 - 3,354	0,441 - 7,051	0.297	No difference
GFP_1	SA_L.b._0-6h	0.704994	0,525 - 0,879	0.087	0.095	No difference		atilla_4	SA_L.b._0-6h	0.166958	0,083 - 0,307	0,056 - 0,385	0.0245	Down
GFP_1								atilla_4
	WT_Lb_0-6h	SA_Lb_0-6h							WT_Lb_0-6h	SA_Lb_0-6h
Max	1.056	1.196						Max	7.051	0.385
Q3	0.706	0.844						Q3	2.963	0.292
med	0.514	0.723						med	1.619	0.188
Q1	0.435	0.544						Q1	1.14	0.096
Min	0.367	0.456						Min	0.441	0.056
24-30h after infection								24-30h after infection
Gene	Treatment Group	Expression Ratio	Std. Error	95% C.I.	P Value	Result		Gene	Treatment Group	Expression Ratio	Std. Error	95% C.I.	P Value	Result
GFP_1	WT_infLb_24h	0.325	0,282 - 0,372	0,257 - 0,409	0.013	Down		atilla_4	WT_infLb_24h	80.2959	10,832 - 650,555	6,196 - 993,538	0.013	Up
GFP_1	SA_infLb_24h	0.576	0,498 - 0,684	0,441 - 0,726	0.0195	Down		atilla_4	SA_infLb_24h	4.51677	0,673 - 38,069	0,126 - 108,026	0.2705	No difference
GFP_1								atilla_4
	WT_Lb_24h	SA_Lb_24h							WT_Lb_24h	SA_Lb_24h
Max	0.409	0.726						Max	993.538	108.026
Q3	0.356	0.654						Q3	408.288	33.316
med	0.328	0.569						med	152.486	4.057
Q1	0.289	0.527						Q1	12.401	1.013
Min	0.257	0.441						Min	6.196	0.126
