# Supplementary material for: Inhibition of the Notch signal transducer CSL by Pkc53E-mediated phosphorylation to fend off parasitic immune challenge in Drosophila
Source: eLife. 2024 Nov 6;12:RP89582. doi: 10.7554/eLife.89582 (PMC11540305; doi:10.7554/eLife.89582)
Supplement: Figure 2—source data 3. [file elife-89582-fig2-data3.xlsx]

## Sheet: Fig 2A 
Survival of non-infected larvae -> pupae -> imago
													Statistics on surviving adult flies
							Raw data
	adult	adult											Mann Whitney test
	Su(H)gwt	Su(H)S269A					Su(H)gwt		Su(H)S269A				P value	0.238095
							pupae	flies	pupae	flies			Exact or approximate P value?	Exact
% hatched	96.55	98.1					116	112	105	103			P value summary	ns
	99.1	96.04					111	110	101	97			Significantly different (P < 0.05)?	No
	100	96.81					112	112	94	91			One- or two-tailed P value?	Two-tailed
	100	98.11					114	114	106	104			Sum of ranks in column A,B	33,50 , 21,50
	100	100					110	110	103	103			Mann-Whitney U	6.5
						sum	563	558	509	498
MW	99.13	97.812
SD	1.49399	1.50857
Survival of infected larvae -> pupae -> imago
Survival after infection with L. boulardi
		flies	wasps	dead pupae			flies	wasps	dead pupae	total			Su(H)S269A
	gSu(H)wt	0.0375	0.6875	0.275		gSu(H)wt	3	55	22	80			vs
		0.03125	0.96875	0			2	62	0	64			Su(H)gwt
		0.0895522	0.716418	0.19403			6	48	13	67
		0.0138889	0.861111	0.125			1	62	9	72
		0	0.766667	0.233333			0	92	28	120			Mann Whitney test
		0.0806452	0.66129	0.258065			5	41	16	62			P value	0.195804
		0.0517241	0.706897	0.241379			3	41	14	58			Exact or approximate P value?	Exact
		0.0382409	0.76673	0.195029		sum	20	401	102	523			P value summary	ns
	gSu(H)S269A	0.08	0.72	0.2		gSu(H)S269A	6	54	15	75			Significantly different (P < 0.05)?	No
		0.0757576	0.848485	0.0757576			5	56	5	66			One- or two-tailed P value?	Two-tailed
		0	0.880597	0.119403			0	59	8	67			Sum of ranks in column A,B	63 , 42
		0	0.934426	0.0655738			0	57	4	61			Mann-Whitney U	14
		0	0.864078	0.135922			0	89	14	103
		0	0.781818	0.218182			0	43	12	55
		0.0163934	0.803279	0.180328			1	49	11	61
		0.0245902	0.834016	0.141393		sum	12	407	69	488
Survival after infection with L. hetrotoma
		flies	wasps	dead pupae			flies	wasps	dead pupae	total			no adult flies
	gSu(H)wt	0	0.860759	0.139241		gSu(H)wt	0	68	11	79
		0	0.95	0.05			0	76	4	80
		0	0.893333	0.106667			0	67	8	75
		0	0.901364	0.0986357		sum	0	211	23	234
	gSu(H)S269A	0	0.972222	0.0277778		gSu(H)S269A	0	70	2	72
		0	0.921053	0.0789474			0	70	6	76
		0	0.949153	0.0508475			0	56	3	59
		0	0.947476	0.0525242		sum	0	196	11	207
Survival after infection with A. japonica
		flies	wasps	dead pupae			flies	wasps	dead pupae	total
	gSu(H)wt	0.157895	0.789474	0.0526316		gSu(H)wt	12	60	4	76
		0.0679612	0.893204	0.038835			7	92	4	103			Su(H)S269A
		0.0957447	0.851064	0.0531915			9	80	5	94			vs
		0.195402	0.689655	0.114943			17	60	10	87			Su(H)gwt
		0.171717	0.747475	0.0808081			17	74	8	99
		0.178571	0.75	0.0714286			10	42	4	56			Mann Whitney test
		0.139806	0.792233	0.0679612		sum	72	408	35	515			P value	0.02381
	gSu(H)S269A	0.0967742	0.83871	0.0645161		gSu(H)S269A	9	78	6	93			Exact or approximate P value?	Exact
		0	0.878049	0.121951			0	36	5	41			P value summary	*
		0.0235294	0.941176	0.0352941			2	80	3	85			Significantly different (P < 0.05)?	Yes
		0.105263	0.868421	0.0263158			8	66	2	76			One- or two-tailed P value?	Two-tailed
		0	0.916084	0.0839161			0	131	12	143			Sum of ranks in column A,B	53 , 25
		0	0.982906	0.017094			0	115	2	117			Mann-Whitney U	4
		0.0342342	0.911712	0.0540541		sum	19	506	30	555
