# Supplementary material for: Inhibition of the Notch signal transducer CSL by Pkc53E-mediated phosphorylation to fend off parasitic immune challenge in Drosophila
Source: eLife. 2024 Nov 6;12:RP89582. doi: 10.7554/eLife.89582 (PMC11540305; doi:10.7554/eLife.89582)
Supplement: Figure 4—source data 1. [file elife-89582-fig4-data1.xlsx]

## Sheet: 4A
ADP-Glo Kinase assay, luciferase activity in RLU
RLU							in % vs PKCa
	PKCα	PKCα + PS	PKCα + Su(H)wt	PKCα + Su(H)SA			PKCα	PKCα + PS	PKCα + Su(H)wt	PKCα + Su(H)SA			Dunn's multiple comparisons test	Mean rank diff,	Significant?	Summary	Adjusted P Value
	20945	256150	326150	209350			131.076	1603.01	2041.07	1310.13			PKCα vs. PKCα + PS	-13.17	Yes	**	0.004635
	20755	254800	186750				129.887	1594.56	1168.7				PKCα vs. PKCα + Su(H)wt	-14.33	Yes	**	0.001511
	11650	243200	253100	126700			72.9067	1521.97	1583.92	792.899			PKCα vs. PKCα + Su(H)SA	-6.1	No	ns	0.824781
	10401	187400	268600	70100			65.0903	1172.76	1680.92	438.692			PKCα + PS vs. PKCα + Su(H)wt	-1.167	No	ns	>0,999999
	18550	262900	207100	132165			116.087	1645.25	1296.05	827.1			PKCα + PS vs. PKCα + Su(H)SA	7.067	No	ns	0.511854
	13575	238050	276500	148975			84.9535	1489.74	1730.36	932.298			PKCα + Su(H)wt vs. PKCα + Su(H)SA	8.233	No	ns	0.269936
MW	15979.3	240417	253033	137458		% MW PKCa	100	1504.55	1583.5	860.224
SD	4684.33	27510.1	50284	49954.9		SD	29.315	172.161	314.682	312.622
						Box plot statistics
							PKCα	PKCα + PS	PKCα + Su(H)wt	PKCα + Su(H)SA
						Upper whisker	131.08	1645.25	2041.07	932.3
						3rd quartile	129.89	1603.01	1730.36	932.3
						Median	100.52	1558.26	1632.42	827.1
						1st quartile	72.91	1489.74	1296.05	792.9
						Lower whisker	65.09	1489.74	1168.7	792.9
						Nr. of data points	6	6	6	5

## Sheet: 4B
ADP-Glo Kinase assay, luciferase activity in RLU
RLU							in % auf PKCa
	Pkc53E	+ PS	+ Su(H)wt	+ Su(H)SA			Pkc53E	+ PS	+ Su(H)wt	+ Su(H)SA		Tukey's multiple comparisons test	Mean Diff	95,00% CI of diff	Below threshold?	Summary	Adjusted P Value
	6862	6242	6472	5802			120.779	109.866	113.915	102.122		Pkc53E vs. + PS	4.38	-12,97 to 21,73	No	ns	0.901425
	5932	6132	6582	6152			104.41	107.93	115.851	108.282		Pkc53E vs. + Su(H)wt	0.3111	-16,52 to 17,14	No	ns	0.999953
	5621	5091	6552	5672			98.9361	89.6075	115.323	99.8338		Pkc53E vs. + Su(H)SA	2.273	-15,08 to 19,62	No	ns	0.984209
	5281	5181	4921	5608			92.9517	91.1916	86.6153	98.7073		+ PS vs. + Su(H)wt	-4.069	-21,42 to 13,28	No	ns	0.91895
	4991	5101	4811	5021			87.8474	89.7835	84.6792	88.3754		+ PS vs. + Su(H)SA	-2.107	-19,96 to 15,74	No	ns	0.988327
	6092	4881	4371	5191			107.226	85.9113	76.9347	91.3676		+ Su(H)wt vs. + Su(H)SA	1.961	-15,39 to 19,31	No	ns	0.989712
	5131	4831	5021	6952			90.3115	85.0312	88.3754	122.363
	5922	6002	5752	4021			104.234	105.642	101.242	70.7743
	5301		6492				93.3037		114.267
MW	5681.44	5432.62	5663.78	5552.38		MW % of PKC53E	100	95.6205	99.689	97.7282
SD	588.575	588.538	890.394	858.261		SD	10.3596	10.359	15.672	15.1064
						Box plot statistics
							Pkc53E	+ PS	+ Su(H)wt	+ Su(H)SA
						Upper whisker	120.78	109.87	115.85	122.36
						3rd quartile	104.41	106.78	114.27	105.2
						Median	98.94	90.48	101.24	99.27
						1st quartile	92.95	87.76	86.62	89.88
						Lower whisker	87.85	85.03	76.93	70.77
						Nr. of data points	9	8	9	8

## Sheet: 4C
ADP-Glo Kinase assay w/o PMA (150nM)
									Raw data of RLU from three experiments without PMA averaged by date and compared to RLU data with PMA from the same experiment
activity enhancement by PMA relative to mean value without PMA																						Dunn's multiple comparisons test	Mean rank diff	Significant?	Summary	Adjusted P Value
										RLU without PMA				RLU with PMA				% of mean value withouth PMA				+ PS vs. + Su(H)wt	1.125	No	ns	>0,999999
	Pkc53E	+ PMA								Pkc53E				Pkc53E				Pkc53E				+ PS vs. + Su(H)SA	6.167	No	ns	0.25351
	+ PS	+ Su(H)wt	+ Su(H)SA						Experiment	+ PS	+ wt	+ SA		+ PS	+ wt	+ SA		+ PS	+ wt	+ SA		+ Su(H)wt vs. + Su(H)SA	5.042	No	ns	0.506072
	125.48	119.32	106.35						exp 23.9.	15220	18430	19090		20830	21280			125.482	119.316
	127.95	128.23	97.46							17980	17240	16020		21240	22870	18670		127.952	128.231	106.351
	106.16	92.67	101.55						MW	16600	17835	17555
	94.08	94.97	126.05
	104.98	108.69	111.81						exp 25.9.	17690	18370	19070		19870	17700	17660		106.157	92.6702	97.4614
	134.5	129.68	75.06							19150	17810	18040		17610	18140	18400		94.0831	94.9738	101.545
	142.28	131								18900	18350	17580		19650	20760	17860		104.982	108.691
	114.27	129.77								19130	21870	17790
	142.38								MW	18717.5	19100	18120
	121.342	116.791	103.047						exp 30.9.	19750	19670	17970		27660	28520	22740		134.5	129.681	126.053
	17.3434	16.0238	16.9326							20310	19540	17460		29260	28810	20170		142.281	130.999	111.807
										21600	22120	18690		23500	28540	13540		114.272	129.772	75.0554
										20600	26640	18040		29280				142.378
									MW	20565	21992.5	18040
Box plot statistics													MW	23211.1	23327.5	18434.3		121.343	116.792	103.046
													SD	4445.06	4686.8	2783.64		17.3427	16.0231	16.9347
	PKC53E + PS + PMA	PKC53E + Su(H)wt + PMA	PKC53E + Su(H)SA + PMA
Upper whisker	142.38	131	126.05
3rd quartile	134.5	129.73	111.81
Median	125.48	123.77	103.95
1st quartile	106.16	101.83	97.46
Lower whisker	94.08	92.67	97.46
Nr. of data points	9	8	6

## Sheet: 4D
ADP-Glo Kinase assay, luciferase activity in RLU
RLU							%EDDD
	EDDD	EDDD + PS	EDDD + Su(H)wt	EDDD + Su(H)SA			EDDD	EDDD + PS	EDDD + Su(H)wt	EDDD + Su(H)SA			Tukey's multiple comparisons test	Mean Diff	95,00% CI of diff	Below threshold?	Summary	Adjusted P Value
	17380	19390	21860	17730			113.481	126.605	142.733	115.766			EDDD vs. EDDD + PS	-10.96	-28,28 to 6,366	No	ns	0.341636
	20030	15300	22760	15120			130.784	99.8999	148.609	98.7246			EDDD vs. EDDD + Su(H)wt	-22.56	-39,88 to -5,234	Yes	**	0.006126
	12410	16070	23110	15830			81.0299	104.928	150.895	103.36			EDDD vs. EDDD + Su(H)SA	9.163	-8,160 to 26,49	No	ns	0.498577
	14400	16480	19100	14220			94.0234	107.605	124.712	92.8481			EDDD + PS vs. EDDD + Su(H)wt	-11.6	-28,92 to 5,723	No	ns	0.292706
	14980	16430	16080	15440			97.8105	107.278	104.993	100.814			EDDD + PS vs. EDDD + Su(H)SA	20.12	2,798 to 37,44	Yes	*	0.017054
	15340	15026	16240	15850			100.161	98.1108	106.038	103.491			EDDD + Su(H)wt vs. EDDD + Su(H)SA	31.72	14,40 to 49,04	Yes	****	8e-05
	13884	17628	19030	10722			90.6542	115.1	124.255	70.0083
	15066	14464	15866	10460			98.372	94.4413	103.596	68.2976
	13084	20710	18408	14250			85.4307	135.224	120.193	93.044
	12940	17790	14806	12060			84.4905	116.158	96.6744	78.7446
	16300	18730	22020	10510			106.429	122.296	143.777	68.624
	17970	15900	15960	14750			117.333	103.818	104.209	96.3087
MW	15315.3	16993.2	18770	13911.8		MW	100	110.955	122.557	90.836
SD	2268.99	1891.97	3027.95	2408.56		SD	14.8152	12.3535	19.7707	15.7265
						Box plot statistics
							EDDD	EDDD + PS	EDDD + Su(H)wt	EDDD + Su(H)SA
						Upper whisker	130.78	135.22	150.89	115.77
						3rd quartile	109.96	119.23	143.25	102.09
						Median	98.09	107.44	122.22	94.68
						1st quartile	88.04	101.86	104.6	74.38
						Lower whisker	81.03	94.44	96.67	68.3
						Nr. of data points	12	12	12	12

## Sheet: 4E
ADP-Glo Kinase assay w/o PMA (150nM)
									Raw data of RLU from three experiments without PMA averaged by date and compared to RLU data with PMA from the same experiment
activity enhancement by PMA relative to mean value without PMA																							Dunn's multiple comparisons test	Mean rank diff,	Significant?	Summary	Adjusted P Value
										RLU without PMA				RLU with PMA				% of mean value withouth PMA					+ PS vs. + Su(H)wt	-3.455	No	ns	>0,999999
	Pkc53E-DDDE		+ PMA							Pkc53E				Pkc53E				Pkc53E					+ PS vs. + Su(H)SA	2.444	No	ns	>0,999999
	+ PS	+ Swt	+ SSA						Experiment	+ PS	+ wt	+ SA		+ PS	+ wt	+ SA		+ PS	+ wt	+ SA			+ Su(H)wt vs. + Su(H)SA	5.899	No	ns	0.485378
	105.18	107.76	127.01						exp 09.03.	7833	6722	6972		7853	7543			105.175	107.757
	110.53	113.9	93.91							7262	6732	7693		8253	7973			110.532	113.9
	102.23	124.91	90.09							7242	7282	6792		7633	8744	9754		102.229	124.914	127.013
	103.3	119.04	110.57							7593	7102	7803		7713	8333			103.3	119.043
	114.82	99.82	96.37							7403	7162	7623		8573				114.818
	94.31	103.05	101.38									9194
	102.33	105.24	109.06						MW	7466.6	7000	7679.5
	94.1	109.39	82.89
	100.96	110.77	81.21						exp 10.03.	10260	8112	9034		8944	8664	8072		94.3128	99.8249	93.9132
	99.27	62.25								9754	8383	9294		9704	8944	7743		102.327	103.051	90.0855
	98.21	62.44								9664	9134	9154		8924	9134	9504		94.1019	105.24	110.574
	105.87									8844	9304	8173		9574	9494	8283		100.956	109.388	96.3681
										8964		7793		9414		8714		99.2689		101.383
										9414	8463	8123		9314	9614	9374		98.2144	110.771	109.061
	102.593	101.688	99.1656						MW	9483.33	8679.2	8595.17
	6.06245	20.6927	14.6342
									12.11.	10400	15960	12060		11010	9935	9354		105.865	62.2494	82.8888
												10510			9965	9164			62.4373	81.2051
Box plot statistics									MW	10400	15960	11285
	PKC53E-DDDE + PMA												MW	8909.08	8940.27	8884.67
	+ PS	+ wt	+ SA										SD	982.849	787.987	709.932
Upper whisker	114.82	124.91	127.01
3rd quartile	105.53	112.34	109.06
Median	102.28	107.76	96.37
1st quartile	98.74	101.44	90.09
Lower whisker	94.1	99.82	81.21
Nr. of data points	12	11	9
