# Supplementary material for: Inhibition of the Notch signal transducer CSL by Pkc53E-mediated phosphorylation to fend off parasitic immune challenge in Drosophila
Source: eLife. 2024 Nov 6;12:RP89582. doi: 10.7554/eLife.89582 (PMC11540305; doi:10.7554/eLife.89582)
Supplement: Figure 5—source data 1. [file elife-89582-fig5-data1.xlsx]

## Sheet: 5A
Luc Assay in HeLa DRBPJ 442 cells
	Su(H) VP16 (460ng)					Tukey's multiple comparisons test	Mean Diff,	95,00% CI of diff	Below threshold?	Summary	Adjusted P Value
		162nM PMA	162nM PMA			Su(H) vs. +PMA	61.74	16,54 to 106,9	Yes	**	0.005398
			21.4nM Stau	21.4nM Stau		Su(H) vs. +PMA +STAU	-59.03	-104,2 to -13,83	Yes	**	0.007878
	105.13	24.1	123.17	154.7		Su(H) vs. +STAU	-80.29	-125,5 to -35,09	Yes	***	0.000395
	94.87	35.67	147.59	239.68		+PMA vs. +PMA +STAU	-120.8	-166,0 to -75,57	Yes	****	2e-06
	108.15	53.2	171.64	223.59		+PMA vs. +STAU	-142	-187,2 to -96,83	Yes	****	<0,000001
	98.63	37.09	144.19	133.92		+PMA +STAU vs. +STAU	-21.27	-66,47 to 23,93	No	ns	0.563343
	99.38	40.77	164.36	128.91
	93.84	38.73	203.21	200.96
MW	100	38.26	159.027	180.293
SD	5.15207	8.547	25.0876	43.3479
	VP16	+ PMA	+ PMA + Stau	+ Stau
Upper whisker	108.15	40.77	203.21	239.68
3rd quartile	105.13	40.77	171.64	223.59
Median	99	37.91	155.98	177.83
1st quartile	94.87	35.67	144.19	133.92
Lower whisker	93.84	35.67	123.17	128.91
Nr. of data points	6	6	6	6

## Sheet: 5B
Crystal cell numbers in the posterior two segments of heated larvae; food covered with 500µl PMA or PMA/STAU
control: food covered with 500µl 10% DMSO
		PMA	PMA + STAU	Tukey's multiple comparisons test	Mean Diff	95,00% CI of diff	Below threshold?	Summary	Adjusted P Value			PMA	PMA + STAU	Dunn's multiple comparisons test	Mean rank diff	Significant?	Summary	Adjusted P Value
	Su(H)gwt	Su(H)gwt	Su(H)gwt	Su(H) gwt vs. Su(H) gwt+PMA	46.5	31,35 to 61,65	Yes	****	<0,000001		Su(H)S269A	Su(H)S269A	Su(H)S269A	Su(H) SA vs. Su(H) SA+PMA	23.6	Yes	**	0.001301
	57	3	141	Su(H) gwt vs. Su(H) gwt+PMA+STAU	-37.63	-52,78 to -22,48	Yes	****	<0,000001		94	90	91	Su(H) SA vs. Su(H) SA+PMA+STAU	16.4	Yes	*	0.043437
	83	15	135	Su(H) gwt+PMA vs. Su(H) gwt+PMA+STAU	-84.13	-97,68 to -70,58	Yes	****	<0,000001		163	74	152	Su(H) SA+PMA vs. Su(H) SA+PMA+STAU	-7.2	No	ns	0.690197
	73	26	124								95	97	87
	63	47	91								180	123	89
	54	17	128								155	84	133
	95	37	122								146	71	103
	76	29	142								119	138	116
	97	33	135								106	77	103
	62	48	32								155	158	167
	66	16	98								109	80	126
	74	21	146								121	97	134
	71	9	155								140	133	114
	85	26	121								136	145	104
	86	53	91								117	160	119
	47	18	145								167	124	80
	53	25	100								121	87	118
	98	8	116								148	88	113
	69	15	96								115	93	116
	61	4	104								111	76	62
	68	14	82								126	84	122
		4	56									161	120
		8	146									151	131
		41	87									74	88
		36	132									85	90
		28	87									78	103
		37	82									125	143
		45	107									72	109
		55	77									117	82
		20	73									87	95
		24	135									68	90
MW	71.9	25.4	109.533							MW	131.2	103.233	110
SD	14.9311	15.0919	30.1098							SD	24.5884	30.4707	23.0457
Box plot statistics
									Box plot statistics
	SuHgwt	PMA	PMA + STAU							SuHS269A	PMA	PMA + STAU
Upper whisker	98.00	55.00	155.00							180.00	161.00	167.00
3rd quartile	84.00	37.00	135.00							151.50	125.00	122.00
Median	70.00	24.50	111.50							123.50	89.00	111.00
1st quartile	61.50	15.00	87.00							113.00	78.00	90.00
Lower whisker	47.00	3.00	32.00							94.00	68.00	62.00
Nr. of data points	20.00	30.00	30.00							20.00	30.00	30.00
