# Supplementary material for: Inhibition of the Notch signal transducer CSL by Pkc53E-mediated phosphorylation to fend off parasitic immune challenge in Drosophila
Source: eLife. 2024 Nov 6;12:RP89582. doi: 10.7554/eLife.89582 (PMC11540305; doi:10.7554/eLife.89582)
Supplement: Figure 6—source data 1. [file elife-89582-fig6-data1.xlsx]

## Sheet: 6A
crystal cell index in lymph glands upon downregulation of Pkc53E												index: (Hnt positive cells / lobe size pixels * 40000)
								lz::Pkc53E-	lz::Pkc53E-	lz::Cas9::		w1118			Su(H)gwt			Su(H)S269A			Pkc53E D28			lz-Gal4			lz::w-RNAi			lz::Cas9			lz::PKC53E-RNAi 27491			lz::PKC53E-RNAi 34716			lz::sgRNA-PKC53E				Tukey's multiple comparisons test	Mean Diff	95,00% CI of diff	Below threshold?	Summary	Adjusted P Value
	w1118	Su(H) gwt	Su(H) S269A	Pkc53E D28	lz-Gal4	lz::w-RNAi	lz::Cas9	RNAi 27491	RNAi 34716	sgRNA Pkc53E		Hnt+ cells	lobe size [px]	index	Hnt+ cells	lobe size [px]	index	Hnt+ cells	lobe size [px]	index	Hnt+ cells	lobe size [px]	index	Hnt+ cells	lobe size [px]	index	Hnt+ cells	lobe size [px]	index	Hnt+ cells	lobe size [px]	index	Hnt+ cells	lobe size [px]	index	Hnt+ cells	lobe size [px]	index	Hnt+ cells	lobe size [px]	index		w1118 vs. Su(H) gwt	-1.895	-8,547 to 4,758	No	ns	0.995975
	9.76	9.31	25.68	40.03	13.91	16.46	15.24	37.28	27.28	26.37		23	94262	9.76	15	64447	9.31	23	35826	25.68	100	99925	40.03	67	192667	13.91	63	153098	16.46	48	125984	15.24	61	65451	37.28	93	136363	27.28	128	194160	26.37		w1118 vs. Su(H) S269A	-26.2	-32,52 to -19,89	Yes	****	<0,000001
	17	3.93	33.39	38.83	8.74	10.56	9.22	30.88	20.08	18.21		26	61176	17	7	71247	3.93	20	23959	33.39	69	71079	38.83	37	169336	8.74	26	98485	10.56	26	112798	9.22	60	77720	30.88	59	117530	20.08	69	151565	18.21		w1118 vs. Pkc53E △28	-25.35	-32,00 to -18,70	Yes	****	<0,000001
	12.22	19.84	40.42	36.82	16.8	22.64	11.25	32.35	19.65	39.15		22	72013	12.22	27	54435	19.84	62	61356	40.42	80	86909	36.82	73	173810	16.8	59	104240	22.64	24	85333	11.25	70	86553	32.35	64	130280	19.65	98	100128	39.15		w1118 vs. lz-Gal4	0.379	-6,274 to 7,032	No	ns	>0,999999
	8.84	5.43	27.22	50.59	18.73	19.51	16.66	28.67	42.36	37.62		14	63348	8.84	9	66298	5.43	37	54372	27.22	140	110694	50.59	45	96103	18.73	72	147617	19.51	42	100840	16.66	59	82316	28.67	108	101983	42.36	127	135035	37.62		w1118 vs. lz::w-RNAi	-3.029	-9,682 to 3,624	No	ns	0.907111
	9.6	11.37	26.86	43.16	12.31	15.67	15.88	36.07	22.17	18.51		17	70833	9.6	22	77397	11.37	40	59568	26.86	128	118628	43.16	49	159220	12.31	32	81685	15.67	33	83123	15.88	65	72082	36.07	55	99233	22.17	95	205294	18.51		w1118 vs. lz::Cas9	0.1585	-6,494 to 6,811	No	ns	>0,999999
	18.98	16.66	32.76	49.62	9.39	19.59	10.3	35.6	28.85	33.48		31	65332	18.98	24	57623	16.66	38	46398	32.76	149	120113	49.62	42	178914	9.39	37	75549	19.59	32	124272	10.3	74	83146	35.6	84	116464	28.85	121	144564	33.48		w1118 vs. RNAi 27491	-15.55	-21,87 to -9,243	Yes	****	<0,000001
	10.68	34	31.97	35.21	18.79	14.37	12.43	35.4	27.49	27.56		18	67416	10.68	41	48235	34	34	42540	31.97	62	70435	35.21	84	178819	18.79	38	105776	14.37	26	83669	12.43	128	144633	35.4	119	173154	27.49	142	206096	27.56		w1118 vs. RNAi 34716	-15.65	-22,30 to -8,995	Yes	****	<0,000001
	10.4	4.64	60.13	28.1	14.11	22.67	12.06	31.48	37.96	30.8		14	53846	10.4	7	60345	4.64	110	73175	60.13	69	98221	28.1	45	127569	14.11	43	75871	22.67	21	69652	12.06	90	114358	31.48	109	114856	37.96	57	74026	30.8		w1118 vs. sgRNA Pkc53E	-15.5	-22,15 to -8,848	Yes	****	<0,000001
	11.33	12.02	29.88	35.44	9.69	9.93	12.41	29.71	27.88	26.5		12	42365	11.33	21	69884	12.02	29	38822	29.88	124	139955	35.44	63	260062	9.69	32	128902	9.93	21	67687	12.41	67	90205	29.71	105	150645	27.88	85	128302	26.5		Su(H) gwt vs. Su(H) S269A	-24.31	-30,62 to -18,00	Yes	****	<0,000001
	10.42	14.43	49.1	47.68	15.33	11.61	10.62	32.35	38.8	24.1		25	95969	10.42	22	60984	14.43	41	33401	49.1	187	156879	47.68	74	193085	15.33	33	113695	11.61	16	60264	10.62	84	103864	32.35	182	187629	38.8	108	179253	24.1		Su(H) gwt vs. Pkc53E △28	-23.46	-30,11 to -16,80	Yes	****	<0,000001
	15.28	10.34	30.76	49.44	12.83	20.25	9.23	22.94	31.48	32.27		43	112565	15.28	13	50290	10.34	38	49415	30.76	166	134304	49.44	42	130943	12.83	59	116543	20.25	23	99675	9.23	63	109852	22.94	90	114358	31.48	95	117756	32.27		Su(H) gwt vs. lz-Gal4	2.274	-4,379 to 8,926	No	ns	0.984882
	14.57	22.24	37.92	30.08	8.81	9.86	17.08	28.46	27.19	29.37		28	76870	14.57	18	32374	22.24	38	40084	37.92	94	125000	30.08	29	131669	8.81	27	109533	9.86	52	121780	17.08	75	105411	28.46	94	138286	27.19	70	95335	29.37		Su(H) gwt vs. lz::w-RNAi	-1.135	-7,787 to 5,518	No	ns	0.999936
	12.07	21.44	35.1	28.06	11.3	13.96	14.91	29.65	21.13	36.64		18	59652	12.07	30	55970	21.44	40	45584	35.1	76	108339	28.06	20	70796	11.3	45	128940	13.96	42	112676	14.91	77	103879	29.65	64	121155	21.13	90	98253	36.64		Su(H) gwt vs. lz::Cas9	2.053	-4,600 to 8,706	No	ns	0.992695
	20.89	7.24	33.04	34.22	13.63	13.09	14.69	27.14	31.18	23.23		45	86166	20.89	8	44199	7.24	36	43584	33.04	104	121566	34.22	35	102715	13.63	39	119175	13.09	40	108918	14.69	68	100221	27.14	91	116742	31.18	95	163582	23.23		Su(H) gwt vs. RNAi 27491	-13.66	-19,97 to -7,348	Yes	****	<0,000001
	13.91	8.86	42.5	31.53	12.4	13.33	8.19	34.03	27.43	20.72		23	66139	13.91	17	76749	8.86	55	51765	42.5	127	161116	31.53	28	903233	12.4	25	75019	13.33	23	112332	8.19	81	95210	34.03	95	138535	27.43	120	231660	20.72		Su(H) gwt vs. RNAi 34716	-13.75	-20,41 to -7,100	Yes	****	<0,000001
	11.72	6.43	43.91	48.25	11.28	22.87	11.68	19.94	22.74	40.27		25	85324	11.72	7	43546	6.43	48	43726	43.91	106	87876	48.25	34	120567	11.28	65	113686	22.87	39	133562	11.68	43	86259	19.94	63	110818	22.74	123	122175	40.27		Su(H) gwt vs. sgRNA Pkc53E	-13.61	-20,26 to -6,953	Yes	****	<0,000001
	13.02	26.86	48.04	33.02	15.63	9.1	16.47	32.52	28.1	25.45		36	110599	13.02	70	104244	26.86	36	29975	48.04	90	109025	33.02	38	97249	15.63	21	92308	9.1	37	89860	16.47	95	116851	32.52	84	119573	28.1	113	177603	25.45		Su(H) S269A vs. Pkc53E △28	0.8536	-5,458 to 7,165	No	ns	0.999991
	14.23	28.93	24.15	35.53	9.25	16.41	16.26	26.15	28.34	26.42		20	56219	14.23	50	69132	28.93	23	38095	24.15	69	77681	35.53	32	138378	9.25	44	107252	16.41	37	91021	16.26	76	116252	26.15	110	155258	28.34	127	192279	26.42		Su(H) S269A vs. lz-Gal4	26.58	20,27 to 32,89	Yes	****	<0,000001
	12.26	15.62	62.34	30.18	9.05	23.64	10.28	16.47	29.01	25.19		27	88091	12.26	17	43534	15.62	72	46198	62.34	76	100729	30.18	22	97238	9.05	55	93063	23.64	37	143969	10.28	31	75288	16.47	97	133747	29.01	87	138150	25.19		Su(H) S269A vs. lz::w-RNAi	23.18	16,86 to 29,49	Yes	****	<0,000001
	11.73	17.21	31.8	40.13	9.35	13.97	10.88	25.19	32.74	27.06		18	61381	11.73	23	53458	17.21	38	47799	31.8	90	89708	40.13	28	119786	9.35	29	83035	13.97	27	99265	10.88	65	103216	25.19	112	136836	32.74	113	167036	27.06		Su(H) S269A vs. lz::Cas9	26.36	20,05 to 32,67	Yes	****	<0,000001
			58.2					21.18										64	43986	58.2													37	69877	21.18								Su(H) S269A vs. RNAi 27491	10.65	4,700 to 16,60	Yes	****	2e-06
			38.99					32.1										43	44114	38.99													93	115888	32.1								Su(H) S269A vs. RNAi 34716	10.56	4,245 to 16,87	Yes	****	1e-05
			38.45					17.38										72	74902	38.45													54	124281	17.38								Su(H) S269A vs. sgRNA Pkc53E	10.7	4,392 to 17,01	Yes	****	7e-06
			42.56					27.57										116	109023	42.56													76	110265	27.57								Pkc53E △28 vs. lz-Gal4	25.73	19,08 to 32,38	Yes	****	<0,000001
			53.57					21.98										69	51521	53.57													64	116470	21.98								Pkc53E △28 vs. lz::w-RNAi	22.32	15,67 to 28,97	Yes	****	<0,000001
																																											Pkc53E △28 vs. lz::Cas9	25.51	18,86 to 32,16	Yes	****	<0,000001
MW	12.9455	14.84	39.1496	38.296	12.5665	15.9745	12.787	28.4996	28.593	28.446				12.9455			14.84			39.1496			38.296			12.5665			15.9745			12.787			28.4996			28.593			28.446		Pkc53E △28 vs. RNAi 27491	9.796	3,485 to 16,11	Yes	****	6.3e-05
SD	3.16378	8.55271	10.9267	7.54239	3.25442	4.78731	2.85127	5.87002	6.08991	6.47187				3.16378			8.55271			10.9267			7.54239			3.25442			4.78731			2.85127			5.87002			6.08991			6.47187		Pkc53E △28 vs. RNAi 34716	9.703	3,050 to 16,36	Yes	***	0.000237
																																											Pkc53E △28 vs. sgRNA Pkc53E	9.85	3,197 to 16,50	Yes	***	0.000174
																																											lz-Gal4 vs. lz::w-RNAi	-3.408	-10,06 to 3,245	No	ns	0.827202
																																											lz-Gal4 vs. lz::Cas9	-0.2205	-6,873 to 6,432	No	ns	>0,999999
																																											lz-Gal4 vs. RNAi 27491	-15.93	-22,24 to -9,622	Yes	****	<0,000001
Box plot statistics																																											lz-Gal4 vs. RNAi 34716	-16.03	-22,68 to -9,374	Yes	****	<0,000001
								lz::Pkc53E-	lz::Pkc53E-	lz::Cas9::																																	lz-Gal4 vs. sgRNA Pkc53E	-15.88	-22,53 to -9,227	Yes	****	<0,000001
	w1118	Su(H) gwt	Su(H) S269A	Pkc53E D28	lz-Gal4	lz::w-RNAi	lz::Cas9	RNAi 27491	RNAi 34716	sgRNA Pkc53E																																	lz::w-RNAi vs. lz::Cas9	3.188	-3,465 to 9,840	No	ns	0.877238
Upper whisker	18.98	34	60.13	50.59	18.79	23.64	17.08	37.28	38.8	40.27																																	lz::w-RNAi vs. RNAi 27491	-12.53	-18,84 to -6,214	Yes	****	<0,000001
3rd quartile	14.4	20.64	43.91	45.42	14.72	19.92	15.56	32.35	31.33	32.88																																	lz::w-RNAi vs. RNAi 34716	-12.62	-19,27 to -5,966	Yes	****	<0,000001
Median	12.14	13.22	37.92	36.17	12.36	15.02	12.23	29.65	27.99	26.78																																	lz::w-RNAi vs. sgRNA Pkc53E	-12.47	-19,12 to -5,819	Yes	****	<0,000001
1st quartile	10.55	8.05	31.8	32.28	9.37	12.35	10.46	25.19	24.96	24.65																																	lz::Cas9 vs. RNAi 27491	-15.71	-22,02 to -9,401	Yes	****	<0,000001
Lower whisker	8.84	3.93	24.15	28.06	8.74	9.1	8.19	16.47	19.65	18.21																																	lz::Cas9 vs. RNAi 34716	-15.81	-22,46 to -9,153	Yes	****	<0,000001
Nr. of data points	20	20	25	20	20	20	20	25	20	20																																	lz::Cas9 vs. sgRNA Pkc53E	-15.66	-22,31 to -9,006	Yes	****	<0,000001
																																											RNAi 27491 vs. RNAi 34716	-0.0934	-6,405 to 6,218	No	ns	>0,999999
																																											RNAi 27491 vs. sgRNA Pkc53E	0.0536	-6,258 to 6,365	No	ns	>0,999999
																																											RNAi 34716 vs. sgRNA Pkc53E	0.147	-6,506 to 6,800	No	ns	>0,999999

## Sheet: 6B
crystal cell numbers in the posterior two segments upon downregulation of Pkc53E
								hml::Pkc53E-	hml::Pkc53E-	hml::Cas9::
		Su(H) gwt	Su(H) S269A	Pkc53E D28	hml-Gal4	hml::w-RNAi	hml::Cas9	RNAi 27491	RNAi 34716	sgRNA Pkc53E		Dunn's multiple comparisons test	Mean rank diff	Significant?	Summary	Adjusted P Value
		59	136	91	106	102	124	198	158	144		Su(H) gwt vs. Su(H) S269A	-154	Yes	****	4e-06
		66	141	125	127	127	103	200	184	196		Su(H) gwt vs. Pkc53E△28	-147.9	Yes	****	1.5e-05
		69	137	61	94	110	160	144	140	129		Su(H) gwt vs. hml-Gal4	-49.14	No	ns	>0,999999
		71	159	118	61	84	75	229	167	124		Su(H) gwt vs. hml::w-RNAi	-38.8	No	ns	>0,999999
		72	158	87	89	99	123	167	134	113		Su(H) gwt vs. hml::Cas9	-33.74	No	ns	>0,999999
		73	165	120	83	110	150	170	152	151		Su(H) gwt vs. RNAi 27491	-314.6	Yes	****	<0,000001
		74	116	194	66	126	109	253	140	159		Su(H) gwt vs. RNAi 34716	-247	Yes	****	<0,000001
		76	118	126	89	115	85	276	136	199		Su(H) gwt vs. sgRNA Pkc53E	-236.4	Yes	****	<0,000001
		77	144	173	55	106	121	165	122	149		Su(H) S269A vs. Pkc53E△28	6.158	No	ns	>0,999999
		78	149	129	58	88	123	240	128	192		Su(H) S269A vs. hml-Gal4	104.9	Yes	**	0.002588
		79	154	172	90	94	183	215	150	141		Su(H) S269A vs. hml::w-RNAi	115.2	Yes	**	0.004112
		83	118	149	135	110	90	221	158	193		Su(H) S269A vs. hml::Cas9	120.3	Yes	**	0.001165
		86	121	63	133	132	176	227	171	193		Su(H) S269A vs. RNAi 27491	-160.6	Yes	****	<0,000001
		87	147	135	68	95	123	187	187	166		Su(H) S269A vs. RNAi 34716	-92.92	Yes	*	0.016487
		88	159	174	111	134	81	147	120	135		Su(H) S269A vs. sgRNA Pkc53E	-82.4	No	ns	0.158979
		89	163	171	92	128	170	176	109	177		Pkc53E △28 vs. hml-Gal4	98.73	Yes	**	0.007075
		91	121	140	110	98	83	233	198	156		Pkc53E △28 vs. hml::w-RNAi	109.1	Yes	**	0.009751
		92	174	179	98	102	108	169	199	164		Pkc53E △28 vs. hml::Cas9	114.1	Yes	**	0.003038
		93	185	221	74	103	143	122	112	145		Pkc53E △28 vs. RNAi 27491	-166.7	Yes	****	<0,000001
		93	154	72	111	101	70	180	178	177		Pkc53E △28 vs. RNAi 34716	-99.08	Yes	**	0.007085
		95	179	164	134	93	73	229	112	188		Pkc53E △28 vs. sgRNA Pkc53E	-88.55	No	ns	0.082278
		97	149	174	82	115	80	191	123	124		hml-Gal4 vs. hml::w-RNAi	10.34	No	ns	>0,999999
		97	115	131	68	98	166	198	161	155		hml-Gal4 vs. hml::Cas9	15.4	No	ns	>0,999999
		99	166	89	106	138	66	231	119	181		hml-Gal4 vs. RNAi 27491	-265.5	Yes	****	<0,000001
		100	141	96	113	110	89	210	144	180		hml-Gal4 vs. RNAi 34716	-197.8	Yes	****	<0,000001
		101	122	209	100	134	89	187	212	184		hml-Gal4 vs. sgRNA Pkc53E	-187.3	Yes	****	<0,000001
		102	142	143	95	111	141	211	138	154		hml::w-RNAi vs. hml::Cas9	5.063	No	ns	>0,999999
		102	131	174	86	102	89	227	198	150		hml::w-RNAi vs. RNAi 27491	-275.8	Yes	****	<0,000001
		102	191	100	153	117	155	156	154	119		hml::w-RNAi vs. RNAi 34716	-208.2	Yes	****	<0,000001
		103	139	186	79	124	180	150	123	165		hml::w-RNAi vs. sgRNA Pkc53E	-197.6	Yes	****	<0,000001
		106	104	77	164	118	89	221	109	124		hml::Cas9 vs. RNAi 27491	-280.9	Yes	****	<0,000001
		108	144	103	147	113	161	231	101	137		hml::Cas9 vs. RNAi 34716	-213.2	Yes	****	<0,000001
		108	101	76	129	117	163	206	166	133		hml::Cas9 vs. sgRNA Pkc53E	-202.7	Yes	****	<0,000001
		109	156	238	81	94	109	176	218	126		RNAi 27491 vs. RNAi 34716	67.66	No	ns	0.396318
		110	135	112	127	109	58	197	229	122		RNAi 27491 vs. sgRNA Pkc53E	78.18	No	ns	0.254773
		113	138	232	130	137	129	208	186	170		RNAi 34716 vs. sgRNA Pkc53E	10.53	No	ns	>0,999999
		114	139	223	137	106	90	195	154	141
		114	164	66	110	107	55	182	184	152
		119	172	153	128	91	78	153	197	125
		122	129	238	159	107	98	147	179	121
		122	132	202	163	102	68	210	104	186
		123	142	106	159	114	55	175	232	156
		125	163	138	131	116	65	221	181	167
		126	112	72	128	117	63	163	155	187
		132	123	105	83	126	86	145	139	155
		133	153	168	104		51	162	208	147
		135	161	121	148		66	144	191	146
		139	156	221	122		106	146	194	164
		139	147	208	142		51	156	238	181
			161	159	159		96	188	153	169
			122	125	120			154	160
			131	96	126			195	182
			99	119	120			172	192
			172	207	136			166	117
			88	97	96			191	164
			112	108	86			158	124
			78	158	150			176	200
			122	130	115			144	206
			79	64	115			163	155
			130	143	122			131	169
			87	139	159			159	200
			112	111	82			187	163
			121	129	83			138	202
			75	173	114			143	211
			133	127	135			255	134
			155	90	113			199	129
			98	76	119			124	159
			125	125	69			189	152
			119	128	62			217	171
			120		84
Box plot statistics
								hml::Pkc53E-	hml::Pkc53E-	hml::Cas9::
		Su(H) gwt	Su(H) S269A	Pkc53E D28	hml-Gal4	hml::w-RNAi	hml::Cas9	RNAi 27491	RNAi 34716	sgRNA Pkc53E
	Upper whisker	139	191	238	164	138	183	276	238	199
	3rd quartile	114	156	173	131	117	129	210	191	177
	Median	100	137.5	129	112	110	93	187	160	155
	1st quartile	86	120	103	86	102	75	158	136	137
	Lower whisker	59	75	61	55	84	51	122	101	113
	Nr. of data points	49	70	69	70	45	50	69	69	50
