# Supplementary material for: Inhibition of the Notch signal transducer CSL by Pkc53E-mediated phosphorylation to fend off parasitic immune challenge in Drosophila
Source: eLife. 2024 Nov 6;12:RP89582. doi: 10.7554/eLife.89582 (PMC11540305; doi:10.7554/eLife.89582)
Supplement: Figure 7—source data 3. [file elife-89582-fig7-data3.xlsx]

## Sheet: 7A
crystal cell numbers in the posterior two segments of single and double mutant larvae
			Su(H) S269A		Su(H)S269D		Dunn's multiple comparisons test	Mean rank diff	Significant?	Summary	Adjusted P Value
	Pkc53E D28	Su(H) S269A	Pkc53E D28	Su(H)S269D	Pkc53E D28		Pkc53E △28 vs. Su(H) S269A	5.386	No	ns	>0,999999
	91	184	159	9	5		Pkc53E △28 vs. Su(H) S269A; Pkc53E △28	4.258	No	ns	>0,999999
	125	186	160	33	3		Pkc53E △28 vs. Su(H)S269D	100.1	Yes	****	<0,000001
	118	131	116	14	2		Pkc53E △28 vs. Su(H)S269D; Pkc53E △28	119.3	Yes	****	<0,000001
	87	199	139	24	6		Su(H) S269A vs. Su(H) S269A; Pkc53E △28	-1.128	No	ns	>0,999999
	120	158	124	9	12		Su(H) S269A vs. Su(H)S269D	94.74	Yes	****	<0,000001
	194	106	123	36	8		Su(H) S269A vs. Su(H)S269D; Pkc53E △28	113.9	Yes	****	<0,000001
	126	109	194	34	16		Su(H) S269A; Pkc53E △28 vs. Su(H)S269D	95.87	Yes	****	<0,000001
	173	121	106	6	5		Su(H) S269A; Pkc53E △28 vs. Su(H)S269D; Pkc53E △28	115	Yes	****	<0,000001
	129	97	124	14	20		Su(H)S269D vs. Su(H)S269D; Pkc53E △28	19.16	No	ns	>0,999999
	172	145	102	13	21
	149	72	133	12	26
	135	126	147	3	8
	174	108	159	4	3
	171	130	165	30	11
	140	209	184	8	3
	179	191	197	9	4
	164	156	120	3	11
	174	71	170	12	9
	131	162	148	13	6
	89	122	106	5	4
	96	126	102	10	10
	143	139	106	6	0
	174	83	152	27	6
	100	88	132	19	1
	186	135	105	8	11
	77	71	126	17	9
	103	97	118	21	14
	112	102	94	30	2
	153	118	125	16	13
	106	95	78	7	4
	138	150	95	10	19
	72	167	115	12	7
	105	87	129	2	2
	168		104	13	2
	121		107	17	5
	159		102	1	1
	125		114	6	3
	96			7	1
	119			7	1
	207			3	1
	97			5	5
	108			4	7
	158			21	3
	130			9	3
	143			13	9
	89
	139
	111
	129
	173
	127
	90
	125
	128
MW	132.37	128.515	129.189	12.9333	7.15556
SD	32.6186	38.505	29.0085	9.1909	6.03383
Box plot statistics
			Su(H) S269A		Su(H) S269A
	Pkc53E △28	Su(H) S269A	Pkc53E △28	Su(H)S269D	Pkc53E △28
Upper whisker	207	209	197	33	20
3rd quartile	159	156	148	17	10
Median	128.5	126	124	10	5
1st quartile	106	97	106	6	3
Lower whisker	72	71	78	1	0
Nr. of data points	54	33	37	45	45

## Sheet: 7B
crystal cell index in lymph glands of single and double mutants
				Su(H) S269A		Su(H)S269D			Pkc53E D28			Su(H) S269A			Su(H) S269A	Pkc53E D28		Su(H) S269D			Su(H) S269D	Pkc53E D28			Dunn's multiple comparisons test	Mean rank diff	Significant?	Summary	Adjusted P Value
		Pkc53E D28	Su(H) S269A	Pkc53E D28	Su(H)S269D	Pkc53E D28			GFP +	lobe [px]	index	GFP +	lobe [px]	index	GFP +	lobe [px]	index	GFP +	lobe [px]	index	GFP +	lobe [px]	index		Pkc53E △28 vs. Su(H) S269A	-0.75	No	ns	>0,999999
		28.42	25.68	33.43	1.03	1.21			61	85843	28.424	23	35823	25.6818	65	77766	33.4336	1	38981	1.02614	3	99436	1.20681		Pkc53E △28 vs. Su(H) S269A; Pkc53E △28	1.5	No	ns	>0,999999
		42.07	33.39	24.2	1.09	0			67	63705	42.0689	20	23962	33.3862	65	107635	24.1557	2	73077	1.09474	0	63673	0		Pkc53E △28 vs. Su(H)S269D	30.5	Yes	***	0.000178
		38.96	40.42	41.33	3.36	1.59			102	104721	38.9607	62	61358	40.4185	106	102589	41.33	5	59448	3.36428	1	25189	1.58799		Pkc53E △28 vs. Su(H)S269D; Pkc53E △28	30	Yes	***	0.000244
		31.86	27.22	36.34	0	0			93	116750	31.863	37	54379	27.2164	94	103456	36.344	0	31922	0	0	36660	0		Su(H) S269A vs. Su(H) S269A; Pkc53E △28	2.25	No	ns	>0,999999
		25.49	32.76	35.46	0	1.73			105	164773	25.4896	37	45178	32.7593	62	69936	35.461	0	70373	0	2	46295	1.72805		Su(H) S269A vs. Su(H)S269D	31.25	Yes	***	0.00011
		41.28	31.97	43.89	1.33	0			142	137583	41.2842	34	42535	31.9737	110	100249	43.8907	3	90397	1.32748	0	26674	0		Su(H) S269A vs. Su(H)S269D; Pkc53E △28	30.75	Yes	***	0.000152
		28.65	29.88	28.83	0	1.11			132	184322	28.6455	33	44175	29.8812	112	155397	28.8294	0	56237	0	2	71814	1.11399		Su(H) S269A; Pkc53E △28 vs. Su(H)S269D	29	Yes	***	0.00045
		35.81	49.1	28.76	1.32	0			97	108325	35.8181	41	33404	49.0959	124	172473	28.7581	2	60652	1.319	0	51943	0		Su(H) S269A; Pkc53E △28 vs. Su(H)S269D; Pkc53E △28	28.5	Yes	***	0.000608
		35.09	37.92	30.9	0	1.66			89	101458	35.0884	38	40084	37.9204	61	78969	30.8982	0	88605	0	1	24160	1.65563		Su(H)S269D vs. Su(H)S269D; Pkc53E △28	-0.5	No	ns	>0,999999
		23.62	33.04	29.38	1.23	0			83	140578	23.6168	35	42367	33.0446	49	66706	29.3827	4	129691	1.2337	0	62654	0
		32.44	42.5	26.907	0	0			75	92472	32.4423	55	51770	42.4957	56	83247	26.9079	0	36517	0	0	81912	0
		35.71	24.15	26.38	0.48	2.44			98	109779	35.7081	22	36444	24.1466	57	86427	26.3806	1	83638	0.478252	2	32758	2.44215
	MW	33.2833	34.0025	32.1506	0.82	0.811667
	SD	5.96114	7.34217	6.09012	0.987393	0.905577
	Box plot statistics
				Su(H) S269A		Su(H)S269D
		Pkc53E △28	Su(H) S269A	Pkc53E △28	Su(H)S269D	Pkc53E △28
	Upper whisker	42.07	49.1	43.89	1.33	2.44
	3rd quartile	37.39	39.17	35.9	1.27	1.62
	Median	33.77	32.9	30.14	0.76	0.56
	1st quartile	28.54	28.55	27.84	0	0
	Lower whisker	23.62	24.15	24.2	0	0
	Nr. of data points	12	12	12	12	12
