# Supplementary material for: Inhibition of the Notch signal transducer CSL by Pkc53E-mediated phosphorylation to fend off parasitic immune challenge in Drosophila
Source: eLife. 2024 Nov 6;12:RP89582. doi: 10.7554/eLife.89582 (PMC11540305; doi:10.7554/eLife.89582)
Supplement: Figure 9—figure supplement 1—source data 1. [file elife-89582-fig9-figsupp1-data1.xlsx]

## Sheet: 9_S1_A
Adults eclosing
non-infected larvae -> pupae -> imago
								Raw data: pupae developed from collected larvae, and adult hatched at 25oC									Dunn's multiple comparisons test	Mean rank diff	Significant?	Summary	Adjusted P Value
				Su(H)S269A										Su(H)S269A			Su(H)gwt vs. Su(H)S269A	6	No	ns	0.584627
	Su(H)gwt	Su(H)S269A	Pkc53ED28	Pkc53ED28				Su(H)gwt		Su(H)S269A		Pkc53ED28		Pkc53ED28			Su(H)gwt vs. Pkc53E△28	2.2	No	ns	>0,999999
								pupae	imago	pupae	imago	pupae	imago	pupae	imago		Su(H)gwt vs. Su(H)S269A; Pkc53E△28	0.6	No	ns	>0,999999
% hatched	96.55	98.1	98.28	100				116	112	105	103	116	114	115	115		Su(H)S269A vs. Pkc53E△28	-3.8	No	ns	>0,999999
	99.1	96.04	98.21	95.98				111	110	101	97	112	110	113	108		Su(H)S269A vs. Su(H)S269A; Pkc53E△28	-5.4	No	ns	0.814724
	100	96.81	98.28	100				112	112	94	91	116	114	114	114		Pkc53ED28 vs. Su(H)S269A; Pkc53E△28	-1.6	No	ns	>0,999999
	100	98.11	99.12	99.09				114	114	106	104	113	112	110	109
	100	100	100	100				110	110	103	103	115	115	112	112
MW	99.13	97.812	98.778	99.014
SD	1.49399	1.50857	0.779243	1.74123

## Sheet: 9_S1_B
	Hemocyte numbers of non infected larvae
	non infected			non infected
	Su(H)gwt	Pkc53E△28		Pkc53E△28
	14660	8173.4		vs
	11893.4	6596.6		Su(H)gwt
	12143.4	6046.6
	11553.4	9088		Unpaired t test
	15220	11040		P value	<0,000001
	13293.4	9176		P value summary	****
	15130	7026.6		Significantly different (P < 0.05)?	Yes
	11293.4	6546.6		One- or two-tailed P value?	Two-tailed
	10410	4486.6		t, df	t=10,56, df=63
	10166.6	9166.6
	13590	6340
	12320	6096.6
	13196.6	8910
	12173.4	7760
	8940	7196.6
	12433.4	7820
	13100	5483.4
	10850	8420
	11966.6	8680
	10796.6	9276.6
	12076.6	7160
	11453.4	7573.4
	13323.4	6693.4
	11796.6	6673.4
	13656.6	7073.4
	8640	7570
	13270	9353.4
	12940	10036.6
	13396.6	11803.4
		10436.6
		11190
		7530
		6713.4
		8936.6
		6770
		6696.6
MW	12264.9	7931.68
SD	1600.25	1679.17
n	29	36

## Sheet: 9_S1_C
	Hemocyte numbers of infected larvae
	infected			infected
	Su(H)gwt	pkc53E△28		pkc53E△28 inf
	11013.4	7643.4		vs
	13646.6	9203.4		Su(H)gwt inf
	10246.6	10566.6
	11436.6	8653.4		Unpaired t test
	9833.4	9123.4		P value	0.000701
	9453.4	9656.6		P value summary	***
	10186.6	9563.4		Significantly different (P < 0.05)?	Yes
	14853.4	9346.6		One- or two-tailed P value?	Two-tailed
	11180	8876.6		t, df	t=3,551, df=68
	14173.4	13132
	10753.4	12566.6
	10503.4	12106.6
	7906.6	6193.4
	9316.6	6166.6
	10680	7016.6
	9890	6670
	6536.6	6340
	8913.4	8166.6
	11520	7910
	11926.6	8190
	10760	9036.6
	9070	11633.4
	9166.6	8346.6
	11583.4	8586.6
	9886.6	10310
	9756.6	11333.4
	8190	6880
	10446.6	7496.6
	9426.6	9473.4
	10503.4	10116.6
	11953.4	8396.6
	8003.4
	10496
	12940
	10712
	9976.6
	13326.6
	8596.6
	11583.4
MW	10521.7	8990.37
SD	1742.8	1852.6
n	39	31
