# Supplementary material for: Inhibition of the Notch signal transducer CSL by Pkc53E-mediated phosphorylation to fend off parasitic immune challenge in Drosophila
Source: eLife. 2024 Nov 6;12:RP89582. doi: 10.7554/eLife.89582 (PMC11540305; doi:10.7554/eLife.89582)
Supplement: Figure 9—source data 1. [file elife-89582-fig9-data1.xlsx]

## Sheet: 9A
Fly survival upon infection with Asobara japonica
-> pupae infected -> imago: fly or wasp
raw data						% measured
	flies	wasps	dead pupa	total			wasps	dead pupa	flies	total		flies
Su(H)gwt	7	46	5	58		Su(H)gwt	79.31	8.62	12.07	1		Tukey's multiple comparisons test	Mean Diff	95,00% CI of diff	Below threshold?	Summary	Adjusted P Value
	3	36	5	44			81.82	11.36	6.82	1		Su(H)gwt vs. Su(H)S269A	10.68	5,258 to 16,11	Yes	***	0.000118
	13	75	10	98			76.53	10.2	13.27	1		Su(H)gwt vs. Pkc53E△28	10.11	4,684 to 15,54	Yes	***	0.000228
	18	76	12	106			71.7	11.32	16.98	1		Su(H)gwt vs. Su(H)S269A; Pkc53E△28	10.2	4,774 to 15,63	Yes	***	0.000205
	18	79	1	98			80.61	1.02	18.37	1		Su(H)S269A vs. Pkc53E△28	-0.5733	-5,999 to 4,852	No	ns	0.990719
	18	77	8	103			74.75	7.77	17.48	1		Su(H)S269A vs. Su(H)S269A; Pkc53E△28	-0.4833	-5,909 to 4,942	No	ns	0.994379
sum	77	389	41	507		% of total	77.4533	8.38167	14.165	1		Pkc53E△28 vs. Su(H)S269A; Pkc53E△28	0.09	-5,336 to 5,516	No	ns	0.999963
Su(H)S269A	2	38	0	40		Su(H)S269A	95	0	5	1
	0	49	5	54			90.74	9.26	0	1
	1	84	9	94			89.36	9.58	1.06	1		wasps
	1	107	1	109			98.16	0.92	0.92	1		Tukey's multiple comparisons test	Mean Diff	95,00% CI of diff	Below threshold?	Summary	Adjusted P Value
	10	91	2	103			88.35	1.94	9.71	1		Su(H)gwt vs. Su(H)S269A	-15.45	-23,62 to -7,272	Yes	***	0.000194
	5	114	0	119			95.8	0	4.2	1		Su(H)gwt vs. Pkc53E△28	-8.74	-16,92 to -0,5635	Yes	*	0.033503
sum	19	483	17	519		% of total	92.9017	3.61667	3.48167	1		Su(H)gwt vs. Su(H)S269A; Pkc53E△28	-8.415	-16,59 to -0,2385	Yes	*	0.042268
Pkc53E△28	6	54	5	65		Pkc53E△28	83.08	7.69	9.23	1		Su(H)S269A vs. Pkc53E△28	6.708	-1,468 to 14,88	No	ns	0.132453
	1	56	8	65			86.15	12.31	1.54	1		Su(H)S269A vs. Su(H)S269A; Pkc53E△28	7.033	-1,143 to 15,21	No	ns	0.107849
	6	86	13	105			81.9	12.39	5.71	1		Pkc53E△28 vs. Su(H)S269A; Pkc53E△28	0.325	-7,851 to 8,501	No	ns	0.99949
	3	100	8	111			90.0901	7.2	2.7	1
	3	106	11	120			88.3333	9.17	2.5	1
	3	99	11	113			87.6106	9.74	2.65	1		dead pupa
sum	22	501	56	579		% of total	86.194	9.75	4.055	1		Dunn's multiple comparisons test	Mean rank diff	Significant?	Summary	Adjusted P Value
Su(H)S269A	3	45	6	54		Su(H)S269A	83.33	11.11	5.56	1		Su(H)gwt vs. Su(H)S269A	6.667	No	ns	0.61303
Pkc53E△28	1	55	0	56		Pkc53E△28	98.21	0	1.79	1		Su(H)gwt vs. Pkc53E△28	-1	No	ns	>0,999999
	6	92	20	118			77.97	16.95	5.08	1		Su(H)gwt vs. Su(H)S269A; Pkc53E△28	-1	No	ns	>0,999999
	3	85	19	107			79.44	17.76	2.8	1		Su(H)S269A vs. Pkc53E△28	-7.667	No	ns	0.360994
	7	88	10	105			83.81	9.52	6.67	1		Su(H)S269A vs. Su(H)S269A; Pkc53E△28	-7.667	No	ns	0.360994
	2	98	6	106			92.45	5.66	1.89	1		Pkc53E△28 vs. Su(H)S269A; Pkc53E△28	0	No	ns	>0,999999
sum	22	463	61	546		% of total	85.8683	10.1667	3.965	1

## Sheet: 9B
% of lamellocytes in hemolymph: GFP + cells vs. DAPI + cells in larval hemolymph w/o L. boulardi infestation
			infested L. boulardi				Su(H) gwt			Pkc53E D28			Su(H) gwt infested with L. boulardi			Pkc53E D28 infested with L. boulardi				Tukey's multiple comparisons test	Mean Diff	95,00% CI of diff	Below threshold?	Summary	Adjusted P Value
	Su(H) gwt	Pkc53E D28	Su(H) gwt	Pkc53E D28		slide #	GFP +	DAPI +	%	GFP +	DAPI +	%	GFP +	DAPI +	%	GFP +	DAPI +	%		Su(H) gwt vs. Pkc53E △28	-0.6348	-5,510 to 4,241	No	ns	0.984895
	0.189304	0.660066	28.2852	4.03712		1	4	2113	0.189304	14	2121	0.660066	607	2146	28.2852	87	2155	4.03712		Su(H) gwt vs. Su(H) gwt inf	-20.35	-25,23 to -15,48	Yes	****	<0,000001
	0.240269	0.376825	25.5319	10.8006		2	5	2081	0.240269	8	2123	0.376825	528	2068	25.5319	228	2111	10.8006		Su(H) gwt vs. Pkc53E △28 inf	-8.515	-13,29 to -3,739	Yes	***	0.000162
	0.0946074	0.377893	21.2756	10.207		3	2	2114	0.0946074	8	2117	0.377893	447	2101	21.2756	212	2077	10.207		Pkc53E△28 vs. Su(H) gwt inf	-19.72	-24,31 to -15,12	Yes	****	<0,000001
	0.140779	0.476872	21.2941	5.50588		4	3	2131	0.140779	10	2097	0.476872	441	2071	21.2941	117	2125	5.50588		Pkc53E△28 vs. Pkc53E △28 inf	-7.88	-12,37 to -3,389	Yes	***	0.000203
	0.189753	0.823643	18.9376	5.34167		5	4	2108	0.189753	17	2064	0.823643	410	2165	18.9376	111	2078	5.34167		Su(H) gwt inf vs. Pkc53E △28 inf	11.84	7,346 to 16,33	Yes	****	<0,000001
	0.191663	1.73221	28.8749	3.367		6	4	2087	0.191663	37	2136	1.73221	598	2071	28.8749	70	2079	3.367
	0.0940291	0.765917	17.8947	16.2019		7	2	2127	0.0940291	16	2089	0.765917	374	2090	17.8947	337	2080	16.2019
	0.235073	0.383509	12.3493	7.77935		8	5	2127	0.235073	8	2086	0.383509	256	2073	12.3493	165	2121	7.77935
		1.34384	20.8117	10.1188		9				29	2158	1.34384	441	2119	20.8117	213	2105	10.1188
		1.11922	9.97602	13.7339		10				23	2055	1.11922	208	2085	9.97602	288	2097	13.7339
				8.45137		11										179	2118	8.45137
MW	0.17	0.81	20.52	8.69		MW			0.171935			0.805999			20.5231			8.68587
Box plot statistics
			infested with L.b.
	Su(H) gwt	Pkc53E △28	Su(H) gwt	Pkc53E △28
Upper whisker	0.24	1.73	28.87	16.2
3rd quartile	0.21	1.12	25.53	10.51
Median	0.19	0.72	21.05	8.45
1st quartile	0.12	0.38	17.89	5.42
Lower whisker	0.09	0.38	9.98	3.37
Nr. of data points	8	10	10	11

## Sheet: 9C
lamellocyte index in lymph glands, attila-GFP positive cells relative to gland size
			infested L. boulardi				Su(H) gwt			Pkc53E D28			Su(H) gwt	infested	with L.b.	Pkc53E D28	infested	with L.b.		Tukey's multiple comparisons test	Mean Diff	95,00% CI of diff	Below threshold?	Summary	Adjusted P Value
	Su(H) gwt	Pkc53E D28	Su(H) gwt	Pkc53E D28			GFP +	lobe [px]	index	GFP +	lobe [px]	index	GFP +	lobe [px]	index	GFP +	lobe [px]	index		Su(H)gwt vs. Pkc53E △28	-0.01867	-5,005 to 4,968	No	ns	>0,999999	A-B
	0	0.0845988	25.52	0.356			0	137305	0	1	118205	0.0845988	106	166115	25.5245	8	224710	0.356014		Su(H)gwt vs. Su(H)gwt inf	-26.28	-31,27 to -21,29	Yes	****	<0,000001	A-C
	0	0.0723196	36.3	0.8678			0	94791	0	1	138275	0.0723197	64	70527	36.2982	12	138281	0.867798		Su(H)gwt vs. Pkc53E△28 inf	-0.7733	-5,760 to 4,213	No	ns	0.976404	A-D
	0	0	40.59	0.535			0	119867	0	0	77809	0	112	110372	40.59	15	280385	0.534979		Pkc53E△28 vs. Su(H)gwt inf	-26.26	-31,25 to -21,28	Yes	****	<0,000001	B-C
	0	0	13.17	1.02444			0	100784	0	0	79161	0	49	148787	13.1732	25	244036	1.02444		Pkc53E△28 vs. Pkc53E△28 inf	-0.7547	-5,741 to 4,232	No	ns	0.978003	B-D
	0	0	45.73	1.00416			0	126109	0	0	112658	0	46	40232	45.7347	17	169295	1.00416		Su(H)gwt inf vs. Pkc53E△28 inf	25.51	20,52 to 30,49	Yes	****	<0,000001	C-D
	0	0	17.88	0.4101			0	131296	0	0	91791	0	37	82774	17.88	9	219482	0.410056
	0	0	40.36	0.8253			0	93576	0	0	166965	0	51	51013	39.9898	11	133283	0.825312
	0	0	19.08	1.16222			1	128812	0.31053	0	174670	0	40	83855	19.0806	22	189293	1.16222
	0	0	21.43	2.38949			1	151917	0.263302	0	197070	0	63	117571	21.4339	8	33480	2.38949
	0	0	19.89	0.5197			0	146013	0	0	229101	0	29	58310	19.8937	7	134695	0.519693
	0	0	27.66	1.06832			0	140020	0	0	115321	0	43	62178	27.6625	13	121686	1.06832
	0	0.565732	19.86	0.5732			0	181875	0	10	176762	0.565732	80	161122	19.8607	12	209356	0.573186
	0	0.129187	31.99	0.5075			0	68215	0	2	154814	0.129187	55	68781	31.9856	8	157635	0.507502
	0.3105	0	14.5	0.5052			0	135688	0	0	155600	0	65	179260	14.5041	6	118757	0.505233
	0.2633	0	20.82	0.4139			0	115531	0	0	162038	0	33	63405	20.8185	10	243361	0.410912
									0.0382554			0.0567892			26.2953			0.810621
	0.0382533	0.0567892	26.3187	0.810822
	0.101344	0.146569	10.2998	0.513818
Box plot statistics
			infested L. boulardi
	Su(H) gwt	Pkc53E D28	Su(H) gwt	Pkc53E D28
Upper whisker	0	0.09	45.73	1.16
3rd quartile	0	0.04	34.14	1.01
Median	0	0	21.43	0.57
1st quartile	0	0	19.47	0.51
Lower whisker	0	0	13.17	0.36
Nr. of data points	15	15	15	15
70	79158		36	86957		25.5245		106	166115	25.5245
18	15892		46	54635		36.2982		64	70527	36.2982
37	31813		75	78559		40.59		112	110372	40.59
35	78887		14	69900		13.1732		49	148787	13.1732
12	14552		34	25680		45.7347		46	40232	45.7347
21	35107		16	47667		17.88		37	82774	17.88
20	26441		31	24572		39.9898		51	51013	39.9898
15	44492		25	39363		19.0806		40	83855	19.0806
41	50455		22	67116		21.4339		63	117571	21.4339
13	16935		16	41375		19.8937		29	58310	19.8937
19	26593		24	35585		27.6625		43	62178	27.6625
52	79352		28	81770		19.8607		80	161122	19.8607
35	36798		20	31983		31.9856		55	68781	31.9856
40	92660		25	86600		14.5041		65	179260	14.5041
21	27817		12	35588		20.8185		33	63405	20.8185
